# Supplementary material for: Antibacterial and aqueous dual-responsive sensing activities of monomeric complexes with uncoordinated imidazole sites
Source: Royal Society of Chemistry journal article supplement (doi:10.1039/c9nj03960k), 2019-01-01
Supplement: c9nj03960k2.pdf [file c9nj03960k2.pdf]

## Electronic Supplementary Information

### Antibacterial and aqueous dual-responsive sensing activities of monomeric complexes with uncoordinated imidazole sites†

Lili Liang,<sup>a</sup> Maomao Miao,<sup>a</sup> Congsen Liu<sup>a</sup>, Zihui Zong,<sup>a</sup> Jun Zhang,<sup>\*b</sup> and Qiang Fang<sup>\*a</sup>

<sup>a</sup>Department of Pharmaceutical Engineering, Bengbu Medical College, Bengbu, Anhui 233030, P. R. China.

<sup>b</sup>School of Materials and Chemical Engineering, Anhui Jianzhu University, Hefei, 230601, P. R. China.

E-mail address:

fq333@souhu.com (Qiang Fang)

zhangjun@ahjzu.edu.cn (Jun Zhang)

#### Contents:

1. General procedures
2. TableS1 Selected Bond Lengths (Å) and Bond Angles (°) in **1-3**.
3. TableS2 Hydrogen bond lengths (Å) and bond angles (°) in **1-3**.
4. TableS3 The quenching constant  $K_{sv}$  or detection limit table of selected MOFs materials for  $\text{Cu}^{2+}$  and  $\text{Hg}^{2+}$  ions.
4. Figure S1 Powder XRD patterns of **1-3**.
5. Figure S2 TG-DSC curves of **1-3** under nitrogen.
6. Figure S3 Images of inhibition zones for **1-3** against *E. coli*, *S. aureus*, *Dysentery* and *Candida*.

**General procedures:** All reagents and solvents were of the analytical reagent grade (AR) and used without further purification. Infrared spectra were recorded on a NICOLET iS50 FT-IR spectrometer with a sample prepared as KBr discs in the range of 4000–400  $\text{cm}^{-1}$ .  $^1\text{H}$ NMR spectra of the ligand was recorded on a Varian mercury-plus 500 spectrometer. Elemental analyses (carbon, hydrogen, and nitrogen) were performed using a Perkin-Elmer 240C Elemental Analyzer. Powder X-ray diffraction (PXRD) patterns were collected in the  $2\theta$  range of  $5^\circ$ – $50^\circ$  at a scan speed of  $0.1^\circ \text{s}^{-1}$  on a Bruker D8 diffractometer ( $\text{Cu } K\alpha$ ,  $\lambda = 0.154056 \text{ nm}$ , 40 kV, 40 mA) at room temperature. Thermal gravimetric analysis (TGA) measurements were conducted on an STA 449-F5 thermal analyzer at a heating rate of  $10^\circ \text{C}/\text{min}$  from  $25^\circ \text{C}$  to  $700^\circ \text{C}$  under a flux of nitrogen. Luminescence spectra for the solid and liquid samples were recorded on an LS-55 fluorescence spectrophotometer. The UV-Vis spectra of the ligand and 1-3 were obtained on a Thermo Evolution 220 UV-Visible Spectrophotometer.

**Table S1** Selected Bond Lengths ( $\text{\AA}$ ) and Bond Angles ( $^\circ$ ) in **1-3**

| 1         |            |           |            |           |            |
|-----------|------------|-----------|------------|-----------|------------|
| Co1-O1    | 0.2129(3)  | Co1-O3    | 0.2109(2)  | Co1-N3    | 0.2147(3)  |
| Co1-N1    | 0.2216(3)  | Co1-N4    | 0.2108(3)  | Co1-N5    | 0.2114(3)  |
| O1-Co1-N1 | 86.33(10)  | O1-Co1-N3 | 88.32(10)  | O3-Co1-O1 | 171.32(10) |
| O3-Co1-N1 | 85.88(9)   | O3-Co1-N3 | 93.38(10)  | O3-Co1-N4 | 91.97(10)  |
| O3-Co1-N5 | 91.36(10)  | N3-Co1-N1 | 75.03(10)  | N4-Co1-O1 | 96.67(10)  |
| N4-Co1-N1 | 147.67(10) | N4-Co1-N3 | 72.90(10)  | N4-Co1-N5 | 76.77(11)  |
| N5-Co1-O1 | 91.50(10)  | N5-Co1-N1 | 135.47(11) | N5-Co1-N3 | 149.44(11) |
| 2         |            |           |            |           |            |
| Cd1-O1    | 0.2403(4)  | Cd1-O2    | 0.2578(4)  | Cd1-O3    | 0.2336(4)  |
| Cd1-N1    | 0.2476(4)  | Cd1-N6    | 0.2366(4)  | Cd1-N2    | 0.2437(4)  |
| Cd1-N4    | 0.2287(4)  |           |            |           |            |
| O1-Cd1-N2 | 137.27(13) | N1-Cd1-O2 | 93.58(13)  | O3-Cd1-N1 | 97.63(13)  |
| O3-Cd1-N2 | 101.34(14) | O3-Cd1-N6 | 79.95(13)  | O3-Cd1-O1 | 113.09(13) |
| O3-Cd1-O2 | 165.42(13) | N2-Cd1-N1 | 64.19(14)  | N2-Cd1-O2 | 91.91(13)  |
| N4-Cd1-O1 | 85.77(14)  | N4-Cd1-N1 | 134.30(14) | N4-Cd1-N2 | 70.19(14)  |
| N4-Cd1-O3 | 88.41(14)  | N4-Cd1-N6 | 156.44(15) | N4-Cd1-O2 | 90.42(13)  |
| N6-Cd1-O1 | 80.18(13)  | N6-Cd1-O2 | 95.73(12)  | N6-Cd1-N1 | 68.10(13)  |
| N6-Cd1-N2 | 132.03(14) | O1-Cd1-O2 | 52.33(12)  | O1-Cd1-N1 | 130.85(13) |
| 3         |            |           |            |           |            |
| Ni1-O1    | 0.2084(4)  | Ni1-O2    | 0.2099(4)  | Ni1-N1    | 0.2141(5)  |
| Ni1-N3    | 0.2053(5)  | Ni1-N4    | 0.2042(5)  | Ni1-N5    | 0.2155(5)  |
| N1-Ni1-N5 | 128.62(19) | O2-Ni1-N5 | 88.08(18)  | O1-Ni1-N5 | 88.76(18)  |
| N3-Ni1-N5 | 153.60(19) | N4-Ni1-N5 | 78.10(19)  | O2-Ni1-N1 | 88.12(18)  |

|           |            |           |           |           |            |
|-----------|------------|-----------|-----------|-----------|------------|
| O1-Ni1-N1 | 89.30(18)  | N3-Ni1-N1 | 77.78(19) | N4-Ni1-N1 | 153.18(19) |
| O1-Ni1-O2 | 173.38(17) | N3-Ni1-O2 | 93.72(18) | N4-Ni1-O2 | 90.87(18)  |
| N3-Ni1-O1 | 91.69(18)  | N4-Ni1-O1 | 94.17(19) | N4-Ni1-N3 | 75.54(19)  |

**Table S2** Hydrogen bond lengths (Å) and bond angles (°) in **1-3**

| Compound | D–H...A                                                    | d(D–H) | d(H...A) | d(D...A)   | ∠DHA        |
|----------|------------------------------------------------------------|--------|----------|------------|-------------|
| <b>1</b> | N2 <sup>i</sup> –H2 <sup>i</sup> ...O1                     | 0.860  | 2.067    | 2.8457(2)  | 150.192(9)  |
|          | O3 <sup>ii</sup> –H3A <sup>ii</sup> ...O2                  | 0.960  | 1.819    | 2.7768(3)  | 175.766(8)  |
|          | O3 <sup>ii</sup> –H3B <sup>ii</sup> ...N6                  | 0.960  | 1.829    | 2.7685(2)  | 165.353(10) |
| <b>2</b> | N5–H5...O2 <sup>iii</sup>                                  | 0.860  | 1.987    | 2.8161(4)  | 161.678(17) |
|          | O3–H3A...N3 <sup>iv</sup>                                  | 0.850  | 1.935    | 2.7218(4)  | 153.335(17) |
| <b>3</b> | O1–H1A...O3 <sup>v</sup>                                   | 0.895  | 1.873    | 2.7616(19) | 171.600(63) |
|          | O2–H2B...O7 <sup>iv</sup>                                  | 0.934  | 1.949    | 2.8152(14) | 153.314(54) |
|          | O2 <sup>iii</sup> –H2A <sup>iii</sup> ...O6 <sup>iii</sup> | 0.935  | 1.989    | 2.9044(13) | 165.883(53) |
|          | N2–H2 <sup>iii</sup> ...O6                                 | 0.880  | 2.281    | 3.0295(17) | 142.854(54) |
|          | N6 <sup>iv</sup> –H6 <sup>iv</sup> ...O3 <sup>v</sup>      | 0.880  | 2.033    | 2.8908(17) | 164.43(6)   |

Symmetry codes: i = 1-x, 1-y, 2-z; ii = -1+x, 0.5+y, z; iii = 1-x, 1-y, 1-z; iv = 1.5-x, 0.5+y, 0.5-z; v = x + 1.5-y, 0.5+z; vi = -x, 0.5+y, 0.5-z.

**Table S3** The quenching constant  $K_{sv}$  or detection limit table of selected MOFs materials for  $\text{Cu}^{2+}$  and  $\text{Hg}^{2+}$  ions.

| MOFs                                                                                                                                                                             | Target           | Solvent            | $K_{sv} / \text{M}^{-1}$ | Detection Limit       | Ref      |
|----------------------------------------------------------------------------------------------------------------------------------------------------------------------------------|------------------|--------------------|--------------------------|-----------------------|----------|
| [Eu(pdca) <sub>1.5</sub> (dmf)] (DMF) <sub>0.5</sub> (H <sub>2</sub> O) <sub>0.5</sub>                                                                                           | $\text{Cu}^{2+}$ | DMF                | 89.4                     |                       | 15(a)    |
| [H <sub>2</sub> N(Me) <sub>2</sub> ][Ln <sub>3</sub> (L) <sub>2</sub> (HCOO) <sub>2</sub> (DMF) <sub>2</sub> (H <sub>2</sub> O)]                                                 | $\text{Cu}^{2+}$ | DMF                | $2.35 \times 10^3$       |                       | 15(d)    |
| [Tb <sub>3</sub> (L) <sub>2</sub> (HCOO)(H <sub>2</sub> O) <sub>5</sub> ] DMF 4H <sub>2</sub> O                                                                                  | $\text{Cu}^{2+}$ | DMF                | $2.0218 \times 10^3$     |                       | 9(b)     |
| Eu <sub>2</sub> (FMA) <sub>2</sub> (OX)(H <sub>2</sub> O) <sub>4</sub> 4H <sub>2</sub> O                                                                                         | $\text{Cu}^{2+}$ | DMF                | 528.7                    |                       | 22(a)    |
| {Mg(DHT)(DMF) <sub>2</sub> } <sub>n</sub>                                                                                                                                        | $\text{Cu}^{2+}$ | DMSO               | 170.2                    |                       | 24(a)    |
| Eu(FBPT)(H <sub>2</sub> O)(DMF)                                                                                                                                                  | $\text{Cu}^{2+}$ | DMF                | 58.5                     |                       | 24(b)    |
| {[Ln <sub>4</sub> (μ <sub>3</sub> -OH) <sub>4</sub> (BPDC) <sub>3</sub> (BPDCA) <sub>0.5</sub> (H <sub>2</sub> O) <sub>6</sub> ]ClO <sub>4</sub> 5H <sub>2</sub> O} <sub>n</sub> | $\text{Cu}^{2+}$ | H <sub>2</sub> O   | $344.9 \pm 10.2$         |                       | 24(c)    |
| [Cd <sub>2</sub> (L)(OH)(H <sub>2</sub> O) <sub>2</sub> ] <sub>n</sub>                                                                                                           | $\text{Cu}^{2+}$ | H <sub>2</sub> O   | $3.09 \times 10^4$       | $6.66 \times 10^{-7}$ | 24(d)    |
| [Cd(HL)(H <sub>3</sub> CCOO)(H <sub>2</sub> O) <sub>n</sub> ]                                                                                                                    | $\text{Cu}^{2+}$ | H <sub>2</sub> O   | $7.488 \times 10^4$      | $6 \times 10^{-8}$    | Our work |
|                                                                                                                                                                                  | $\text{Hg}^{2+}$ | H <sub>2</sub> O   | $4.08 \times 10^4$       | $1.1 \times 10^{-7}$  |          |
| [TbL <sub>1.5</sub> (H <sub>2</sub> O) <sub>2</sub> ] H <sub>2</sub> O                                                                                                           | $\text{Hg}^{2+}$ | H <sub>2</sub> O   | $7.465 \times 10^3$      |                       | 25(a)    |
| [Zn(2-NH <sub>2</sub> bdc)(bipb)] <sub>n</sub>                                                                                                                                   | $\text{Hg}^{2+}$ | H <sub>2</sub> O   | $4.55 \times 10^3$       | $4.2 \times 10^{-8}$  | 25(b)    |
| {[Cd(BIPA)(tfbdc)(H <sub>2</sub> O)] DMF} <sub>n</sub>                                                                                                                           | $\text{Hg}^{2+}$ | DMF                | $1.27 \times 10^4$       | $1.2 \times 10^{-7}$  | 14(c)    |
| [Zn(μ <sub>2</sub> -1H-ade)(μ <sub>2</sub> -SO <sub>4</sub> )] <sub>n</sub>                                                                                                      | $\text{Hg}^{2+}$ | H <sub>2</sub> O   | $7.7 \times 10^3$        | $7 \times 10^{-8}$    | 24(d)    |
| {[Cd(BIPA)(IPA)] DMF} <sub>n</sub>                                                                                                                                               | $\text{Hg}^{2+}$ | DMF                | $9.21 \times 10^3$       | $5 \times 10^{-7}$    | 23(b)    |
| {[Cd(BIPA)(HIPA)] DMF} <sub>n</sub>                                                                                                                                              | $\text{Hg}^{2+}$ | DMF                | $1.28 \times 10^4$       | $2.5 \times 10^{-7}$  |          |
| [Zn(OBA)(DPT) <sub>0.5</sub> ] DMF                                                                                                                                               | $\text{Hg}^{2+}$ | H <sub>2</sub> O   | $3.737 \times 10^3$      | $1.8 \times 10^{-6}$  | 25(c)    |
|                                                                                                                                                                                  | $\text{Hg}^{2+}$ | CH <sub>3</sub> CN | $6.3618 \times 10^4$     | $6.9 \times 10^{-6}$  |          |

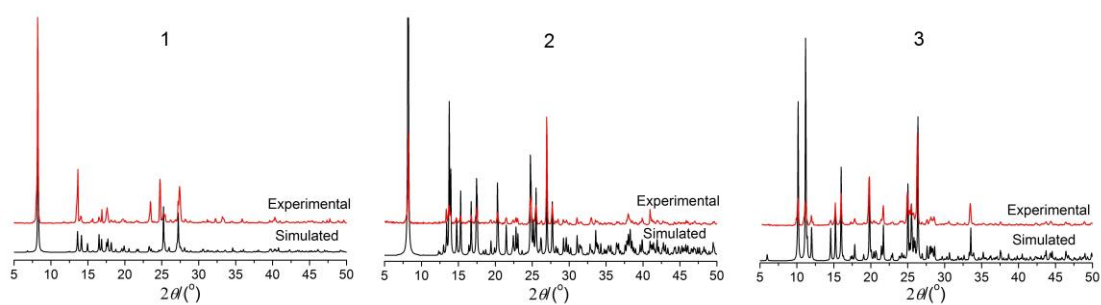

**Figure S1** Powder XRD patterns of **1-3**

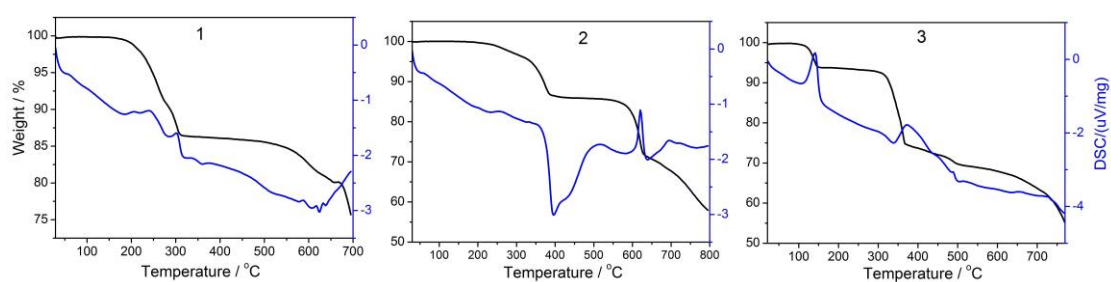

**Figure S2** TG-DSC curves of **1-3** under nitrogen

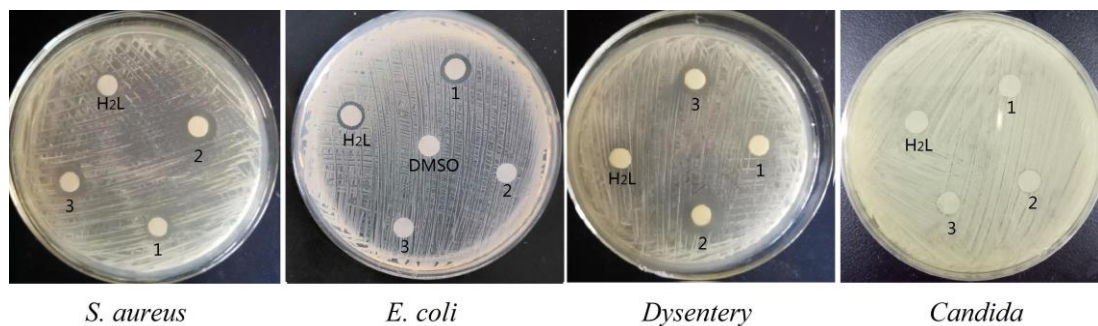

**Figure S3** Images of inhibition zones for **1-3** against *E. coli*, *S. aureus*, *Dysentery* and *Candida*.
