# Supplementary figures and images for: Antibacterial and aqueous dual-responsive sensing activities of monomeric complexes with uncoordinated imidazole sites
Source: Royal Society of Chemistry journal article supplement (doi:10.1039/c9nj03960k), 2019-01-01

1

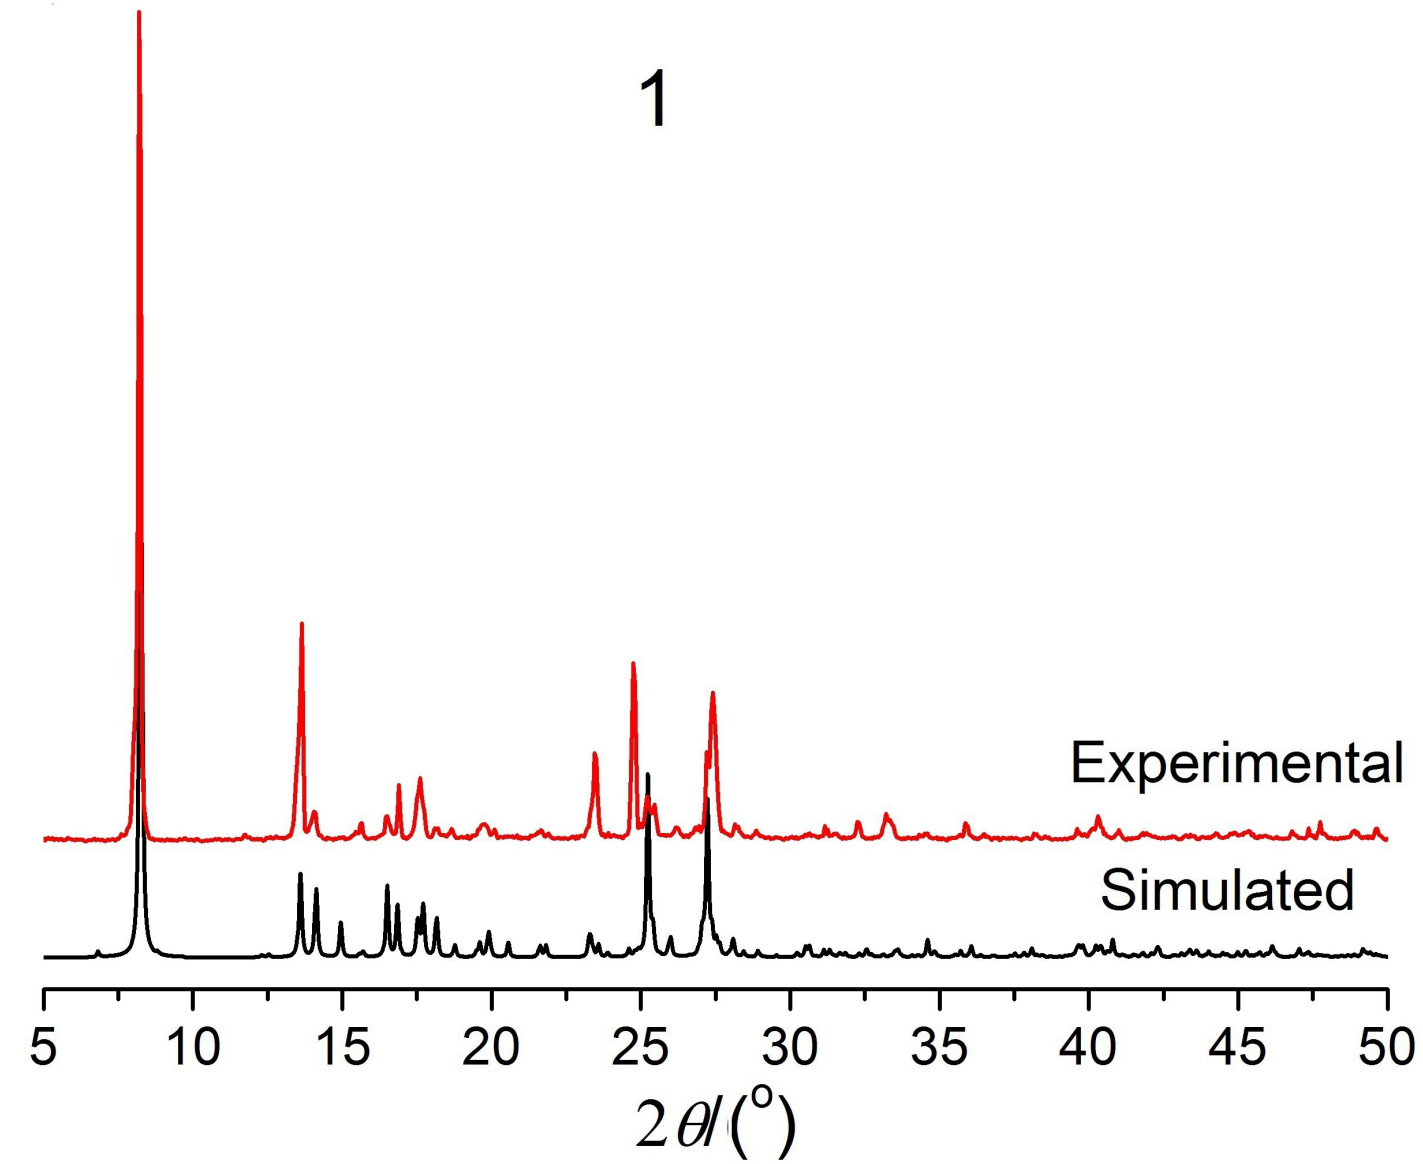

2

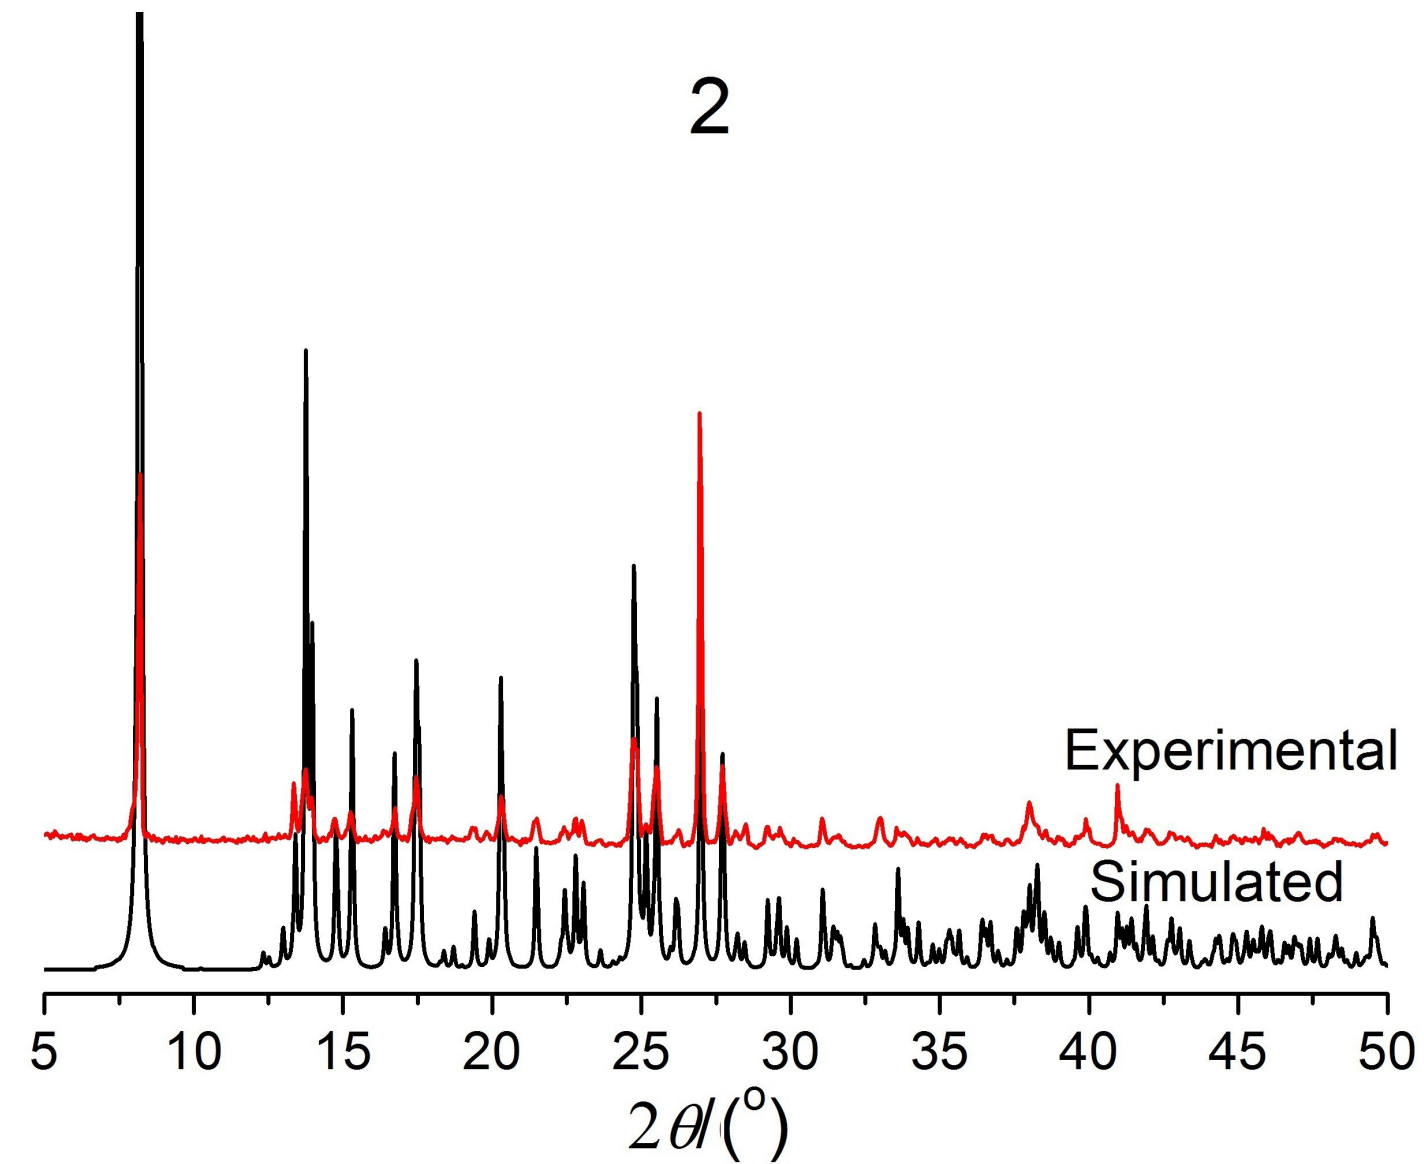

3

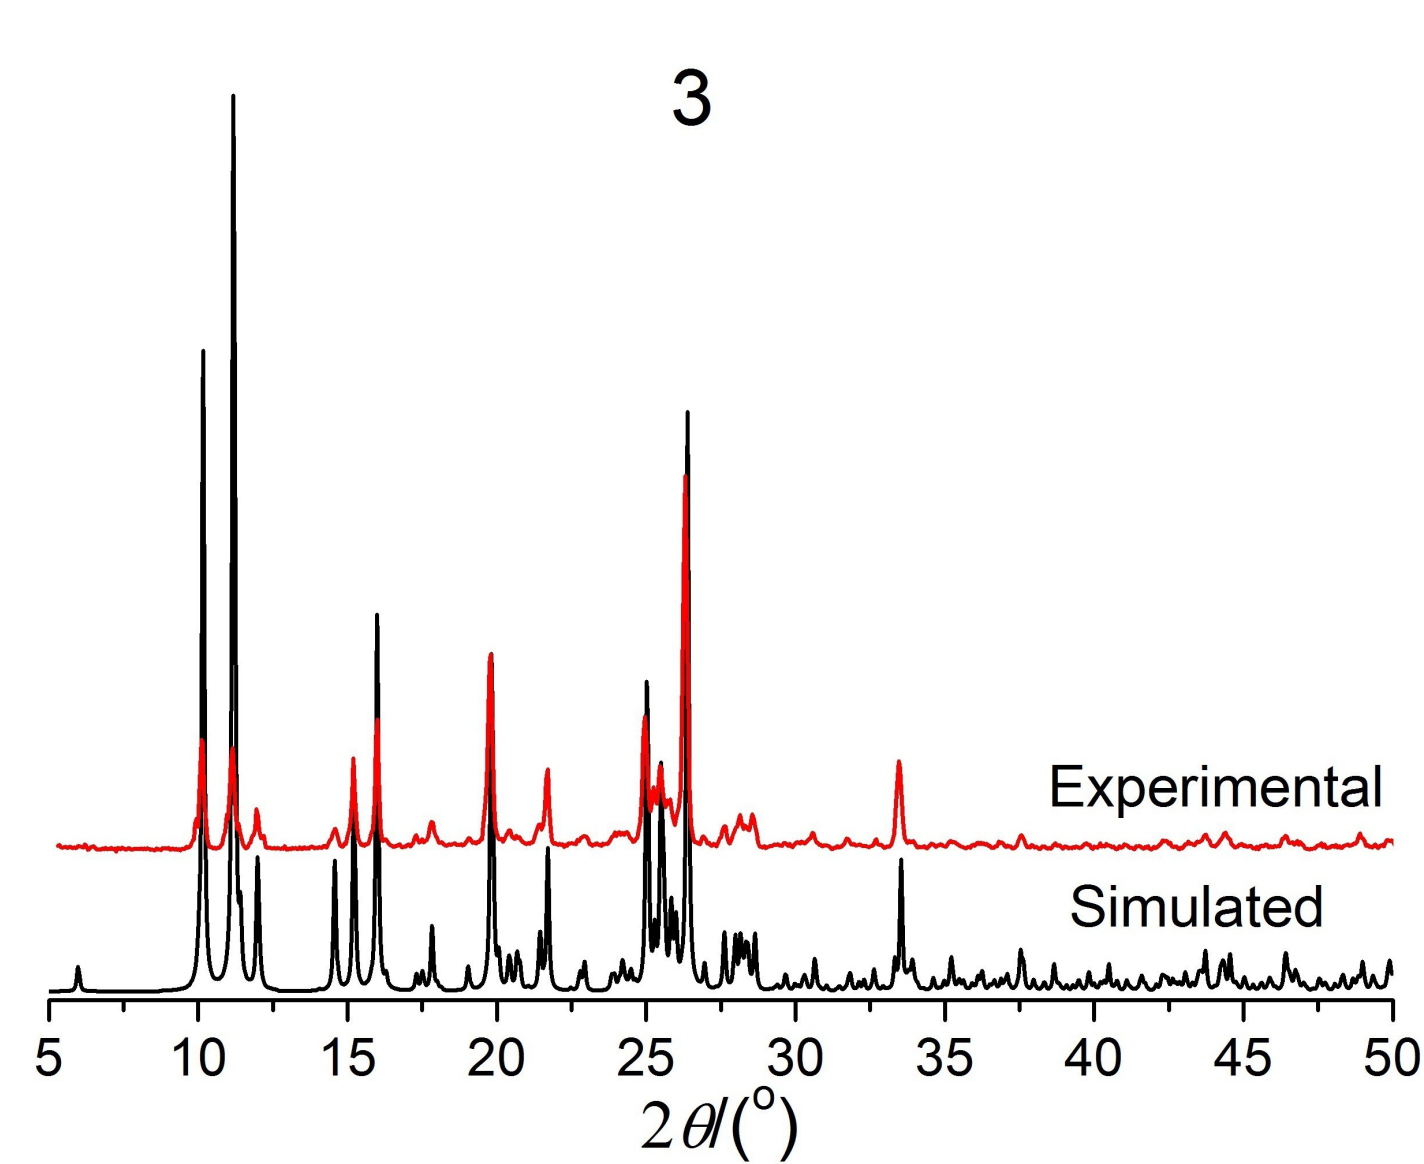

Supplement: c9nj03960k3.pdf [file c9nj03960k3.pdf]

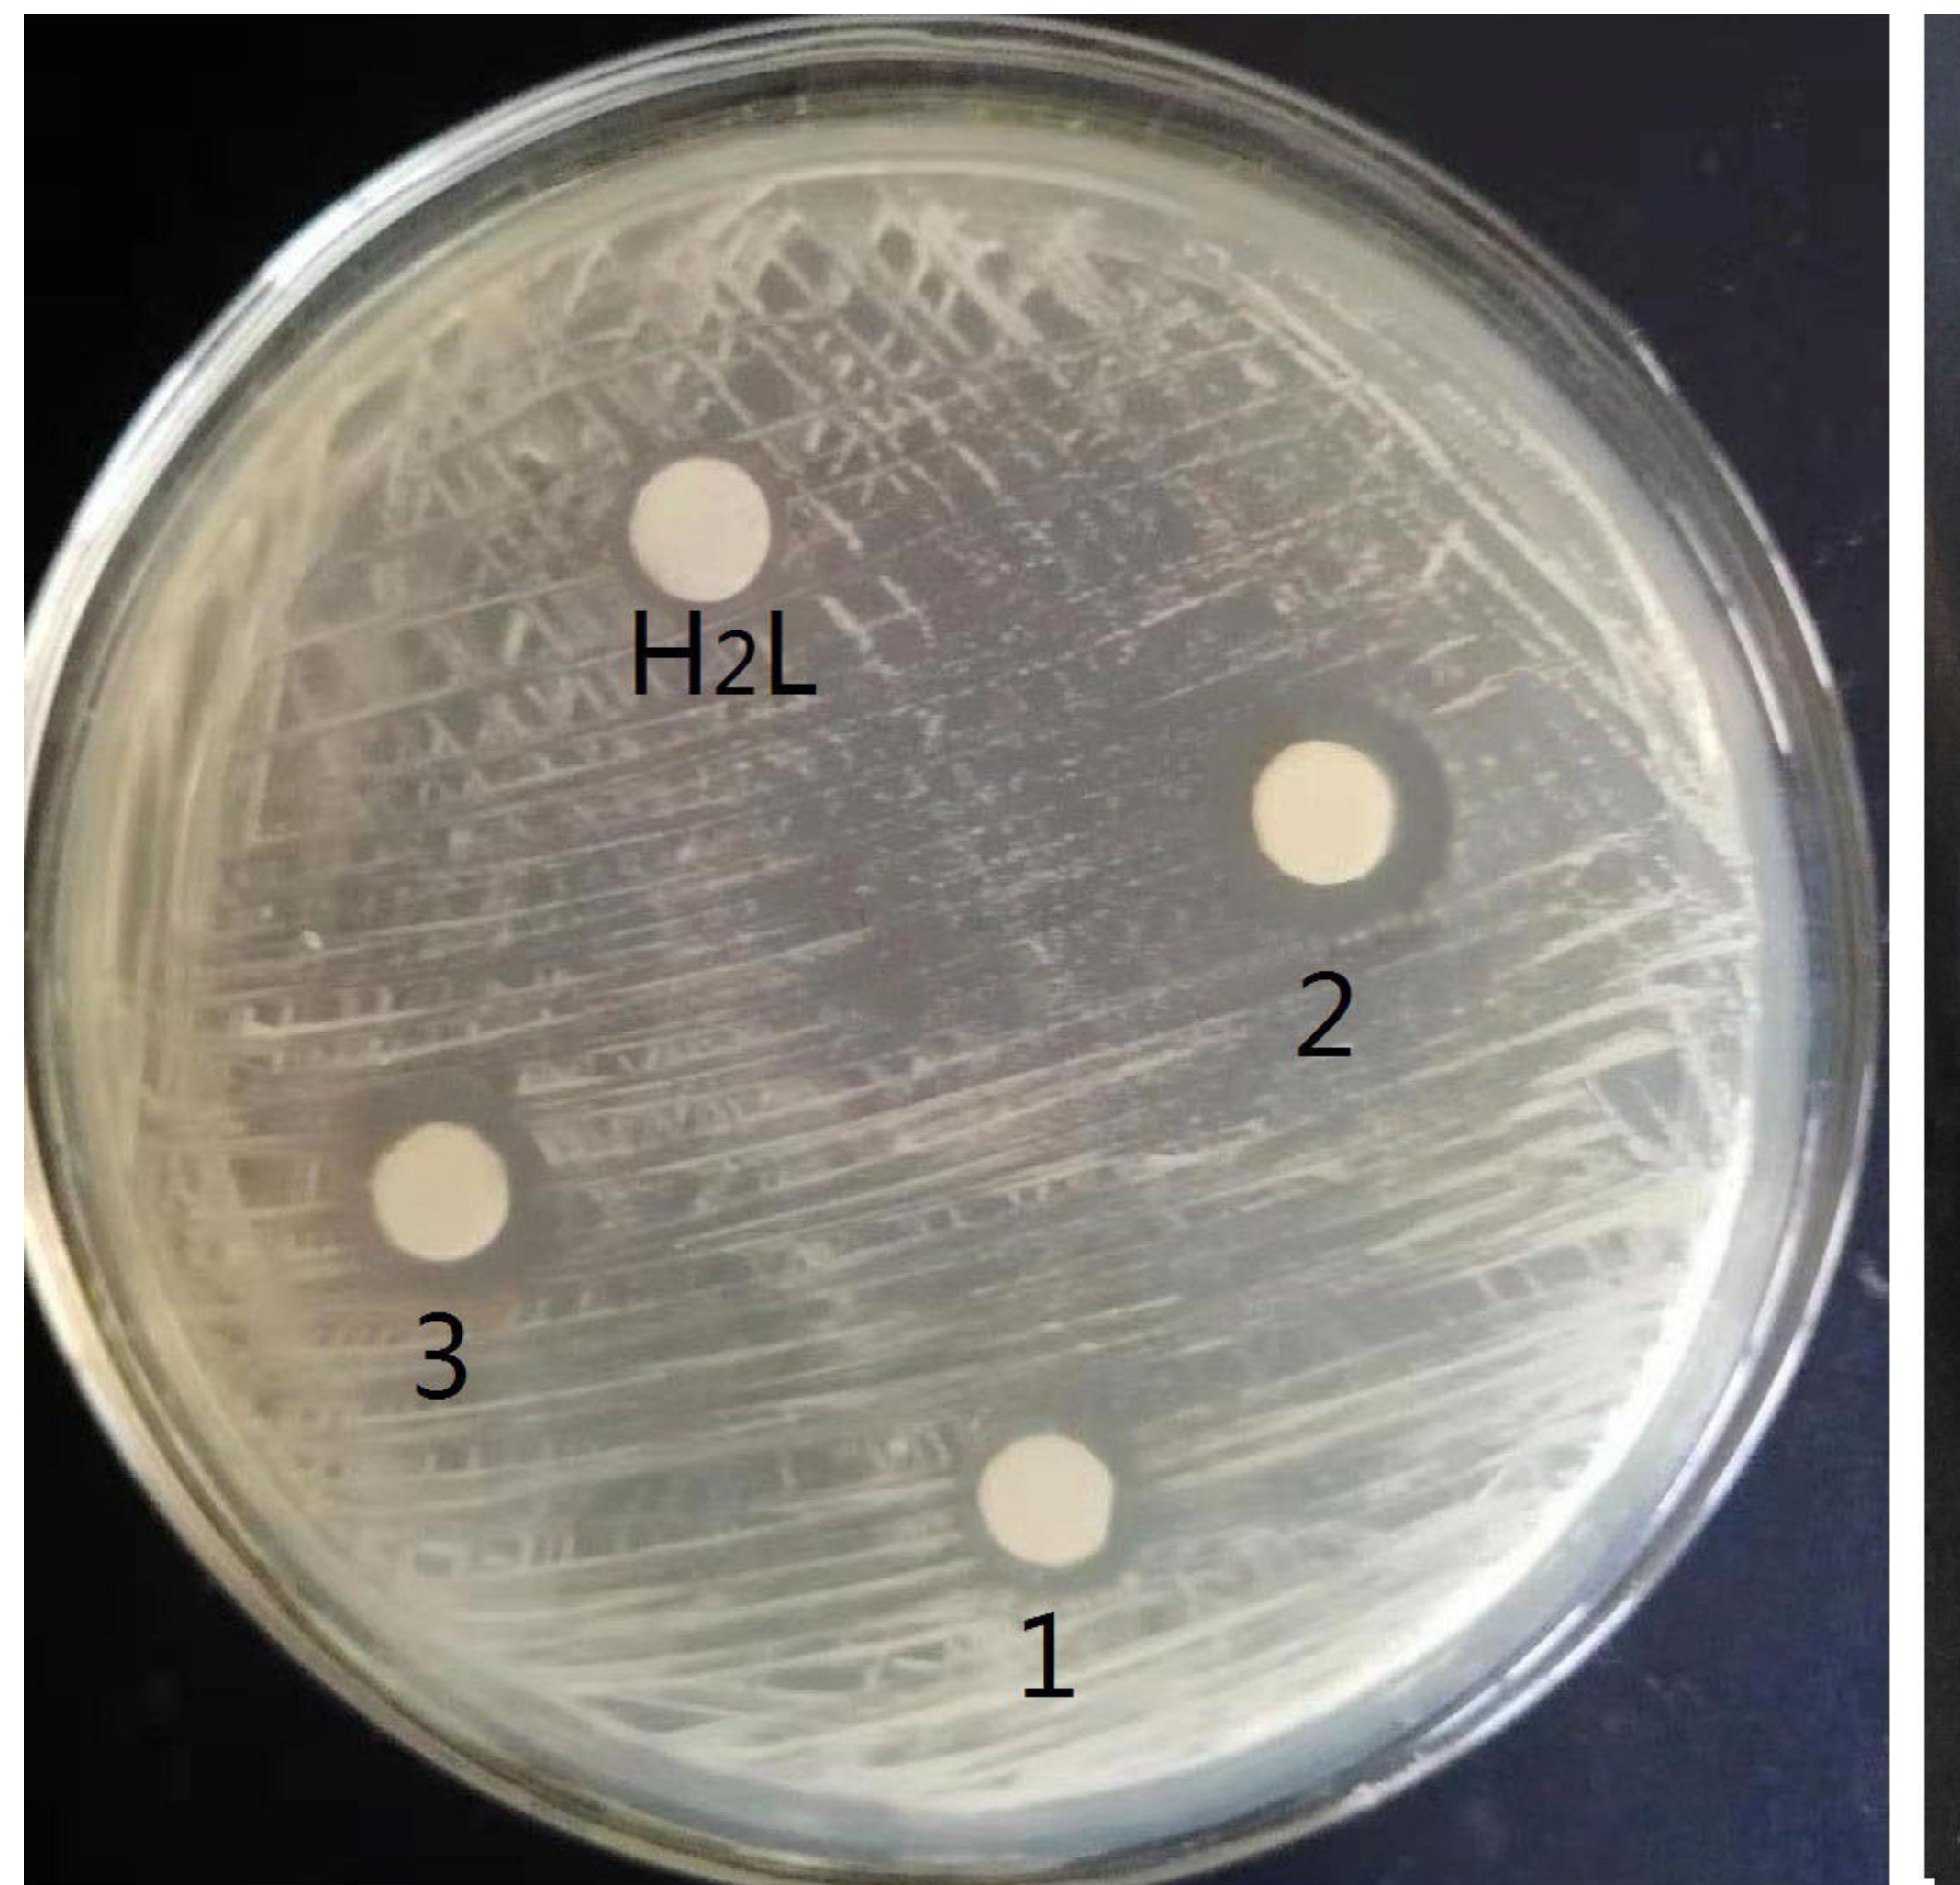

*S. aureus*

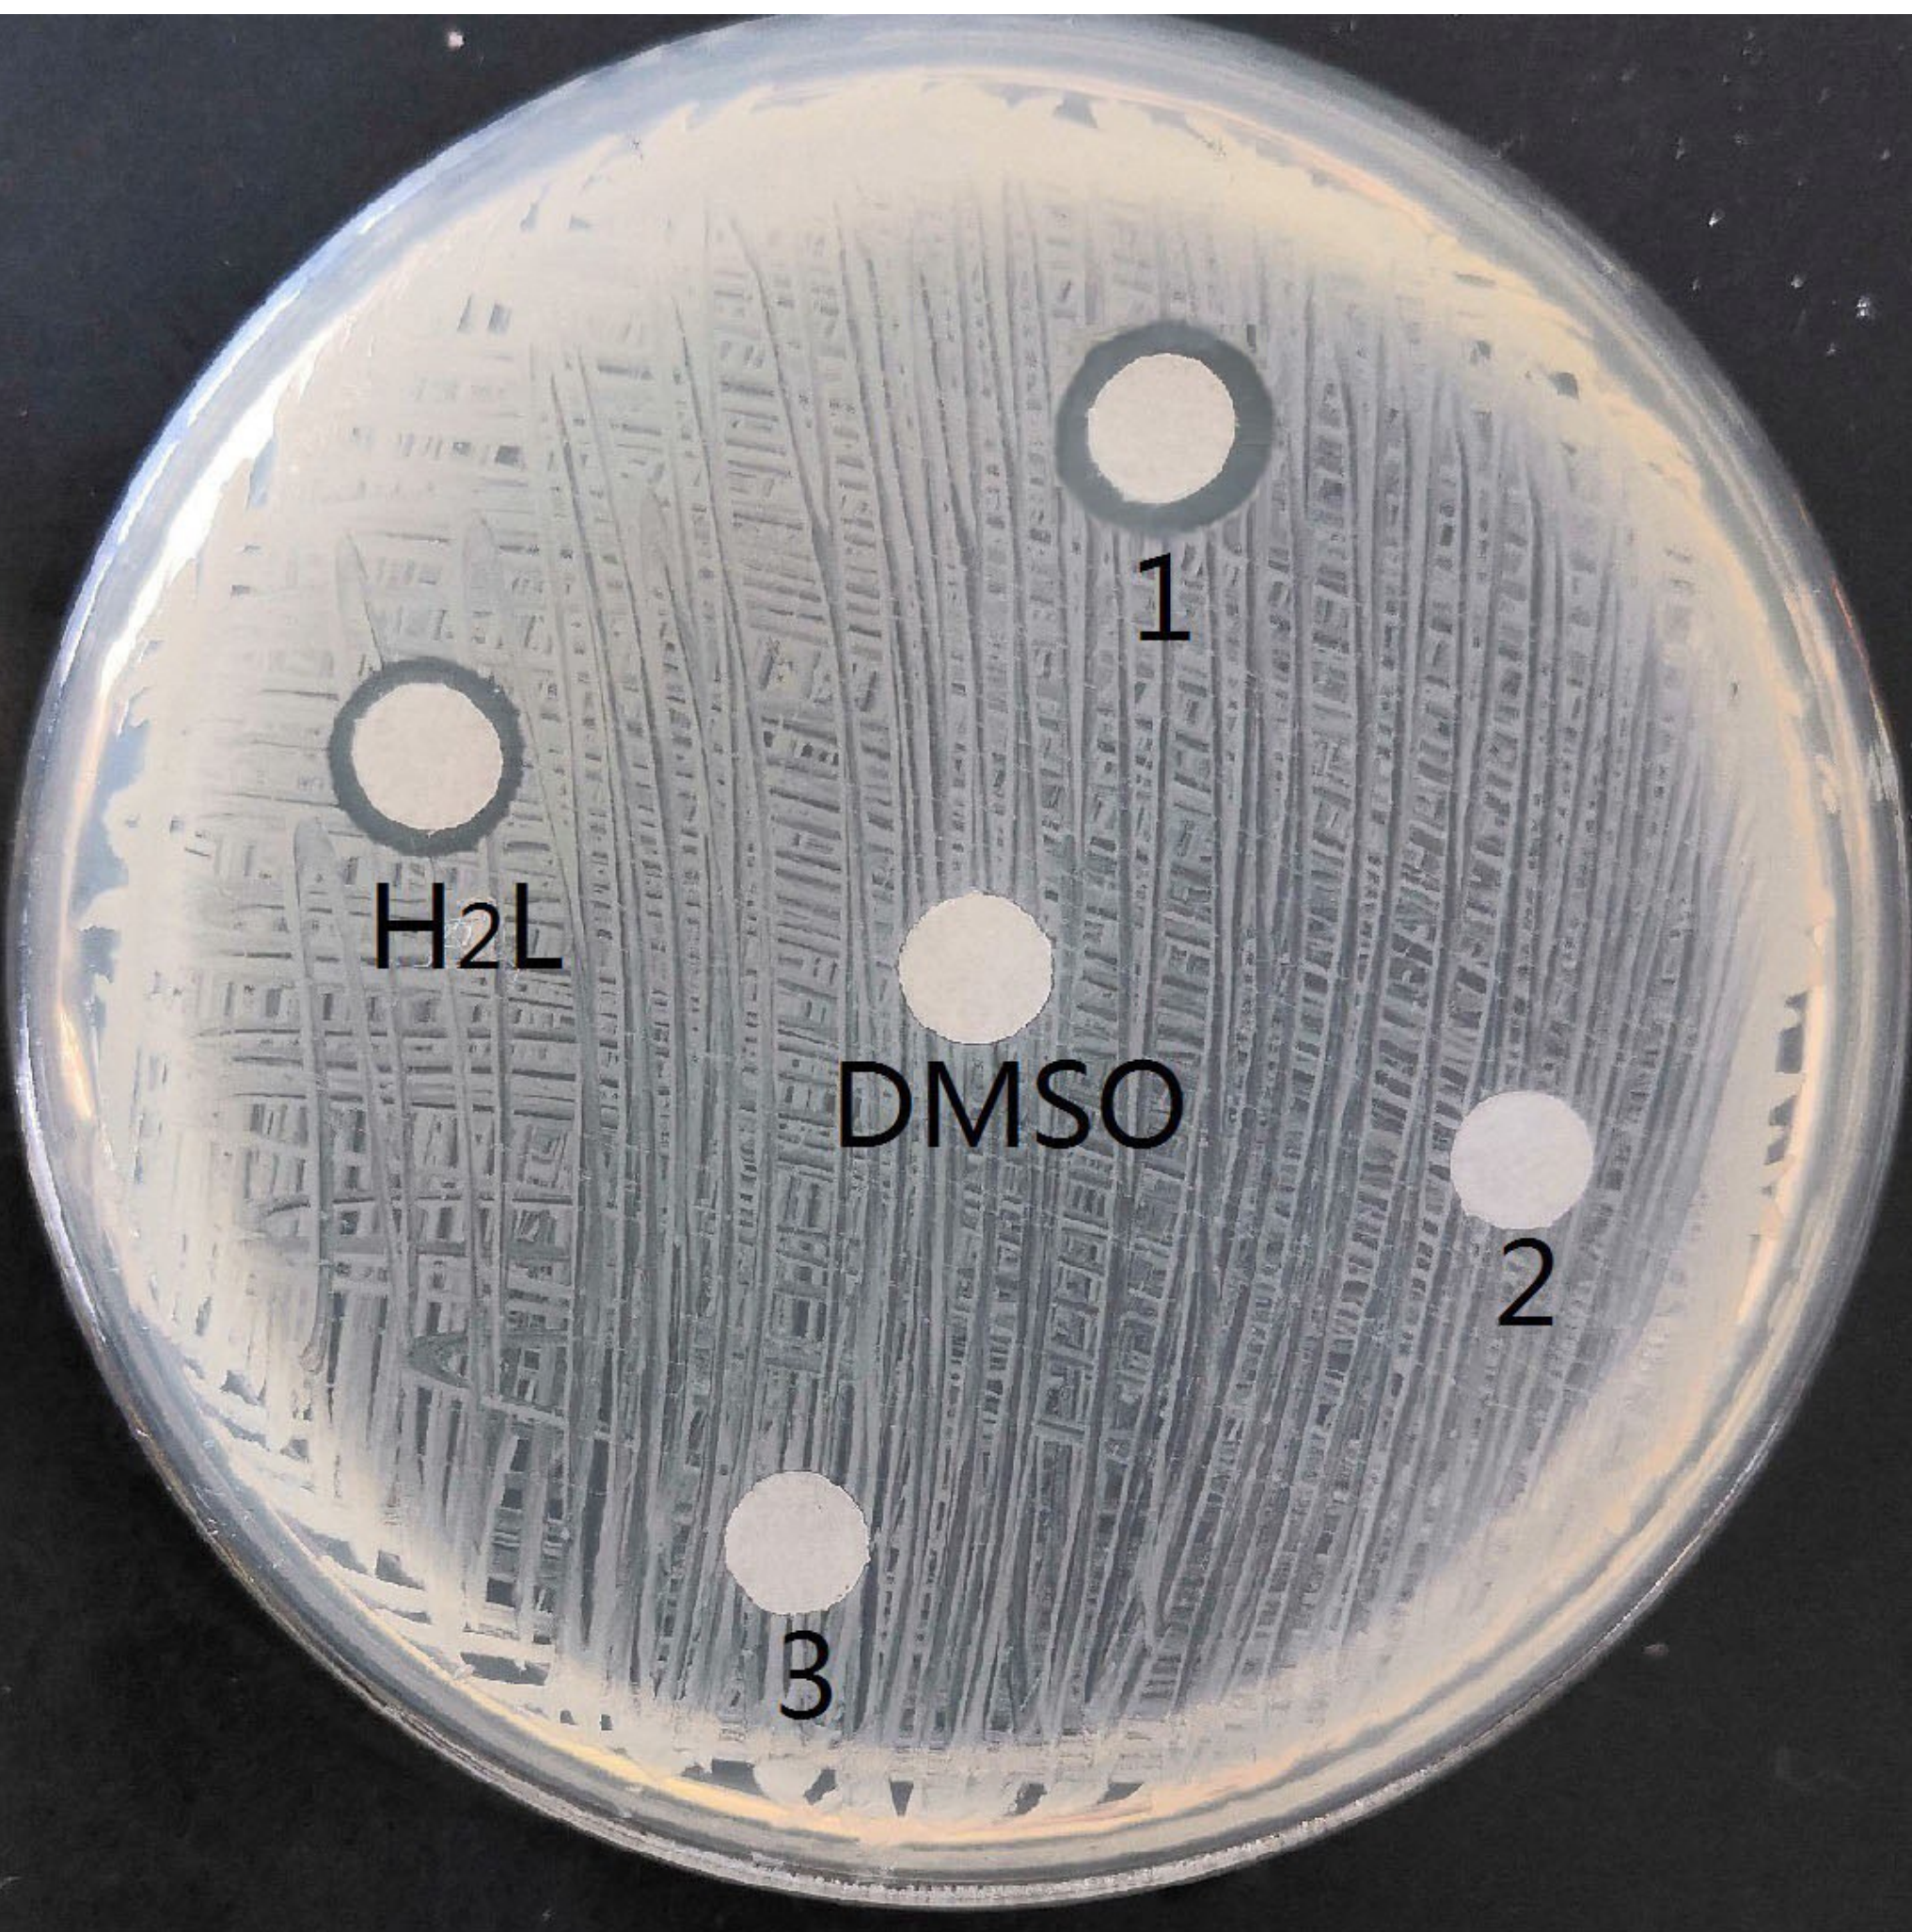

*E. coli*

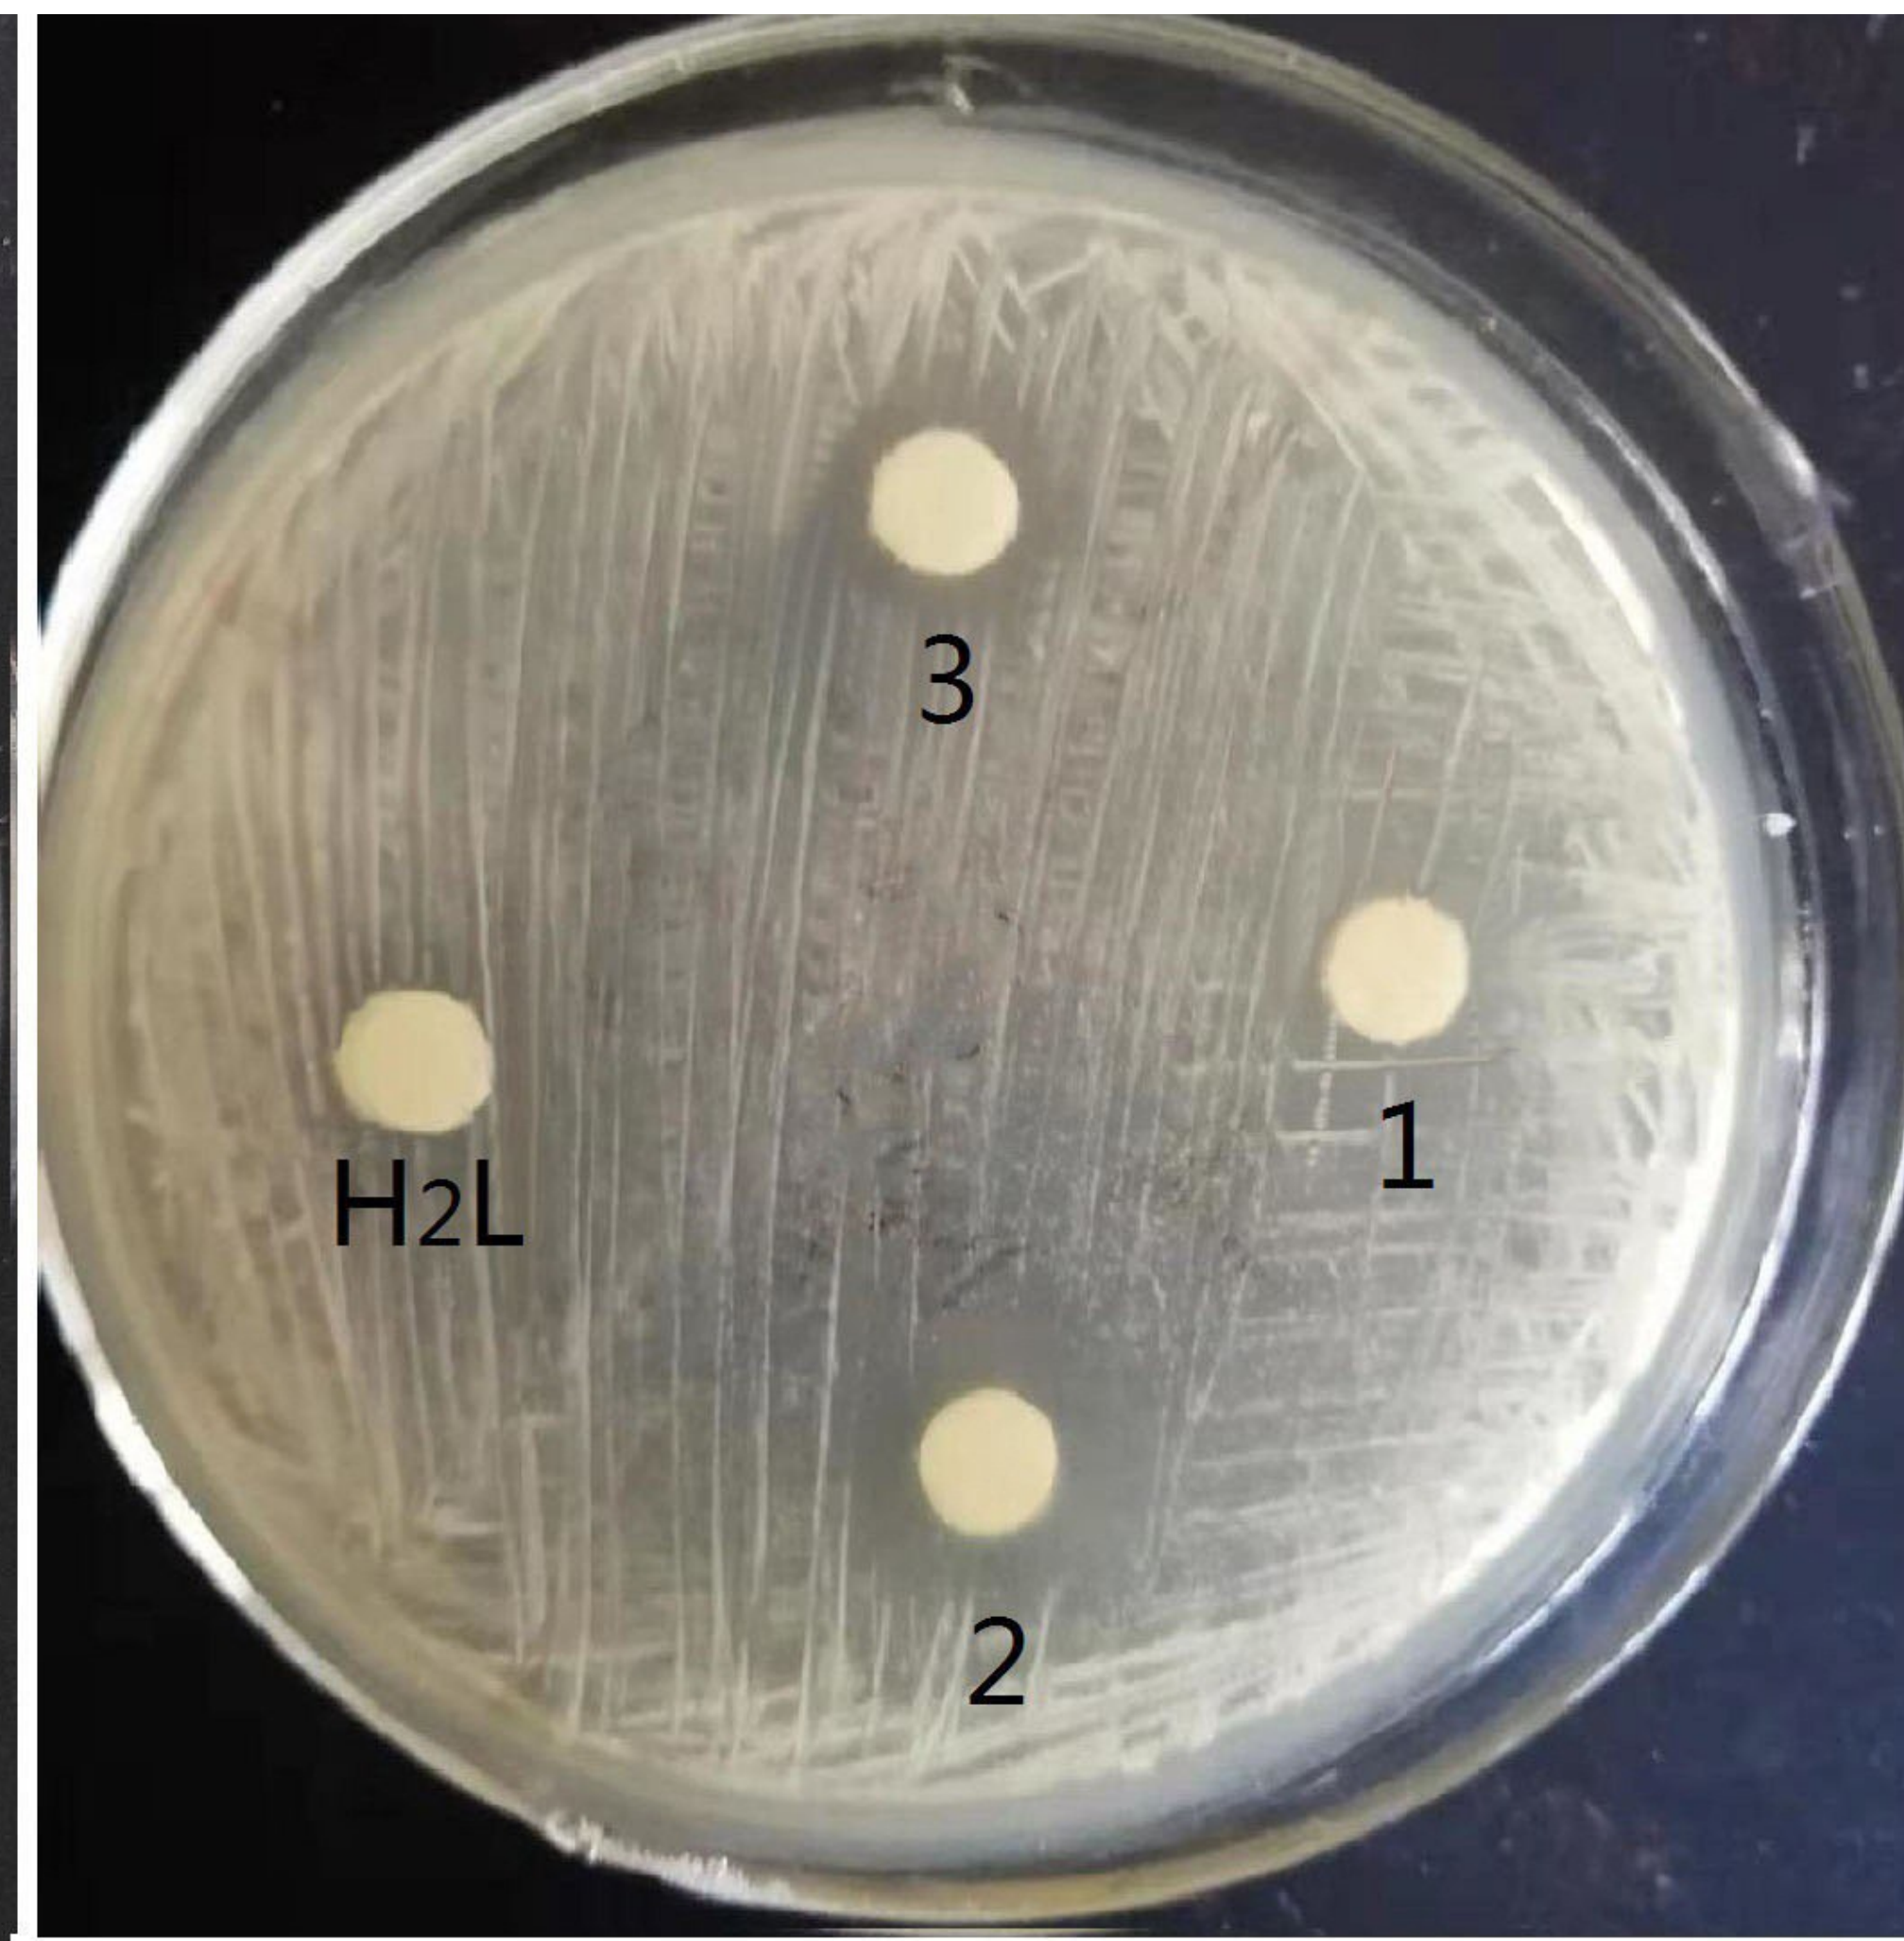

*Dysentery*

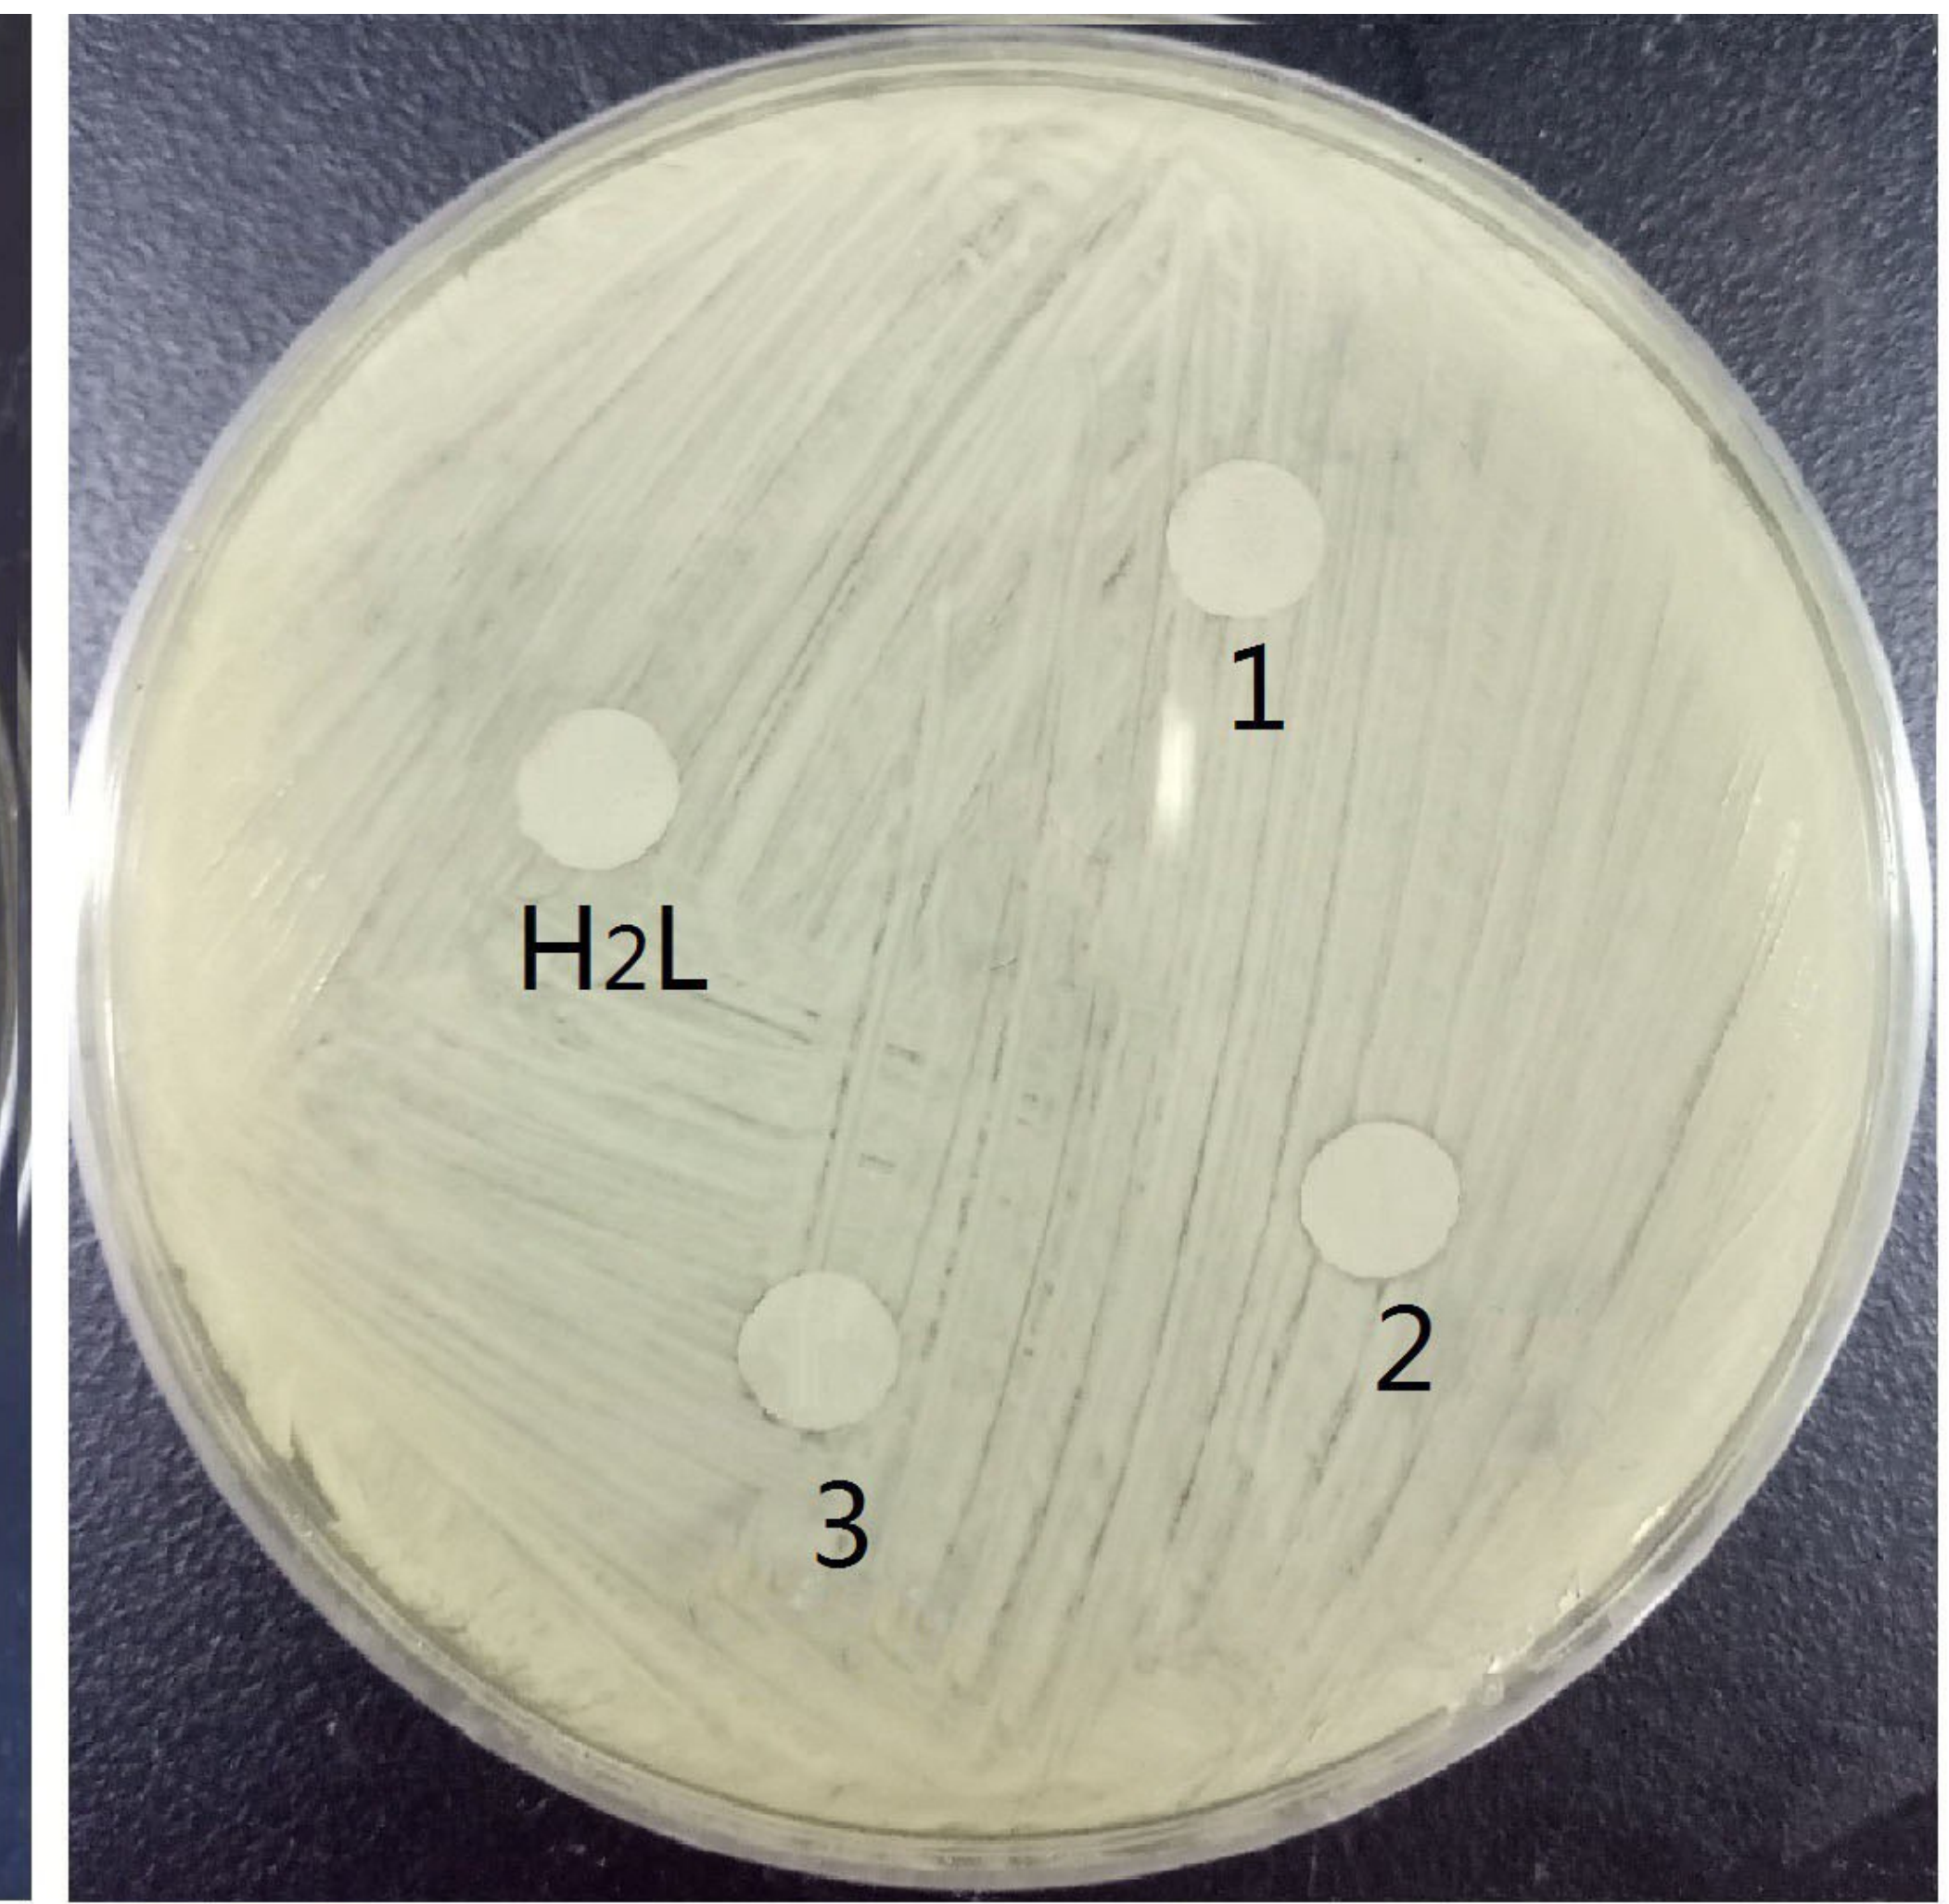

*Candida*

Supplement: c9nj03960k5.pdf [file c9nj03960k5.pdf]
